# Supplementary material for: Clinicopathological and prognostic significance of S100A4 overexpression in colorectal cancer: a meta-analysis
Source: PubMed Central journal article supplement (PMC3833630; doi:10.1186/1746-1596-8-181), 2013-11-04
Supplement: 1746-1596-8-181-S1.pdf [file 1746-1596-8-181-S1.pdf]

## Supplementary Figure S1

### 1. Age (old vs. young);

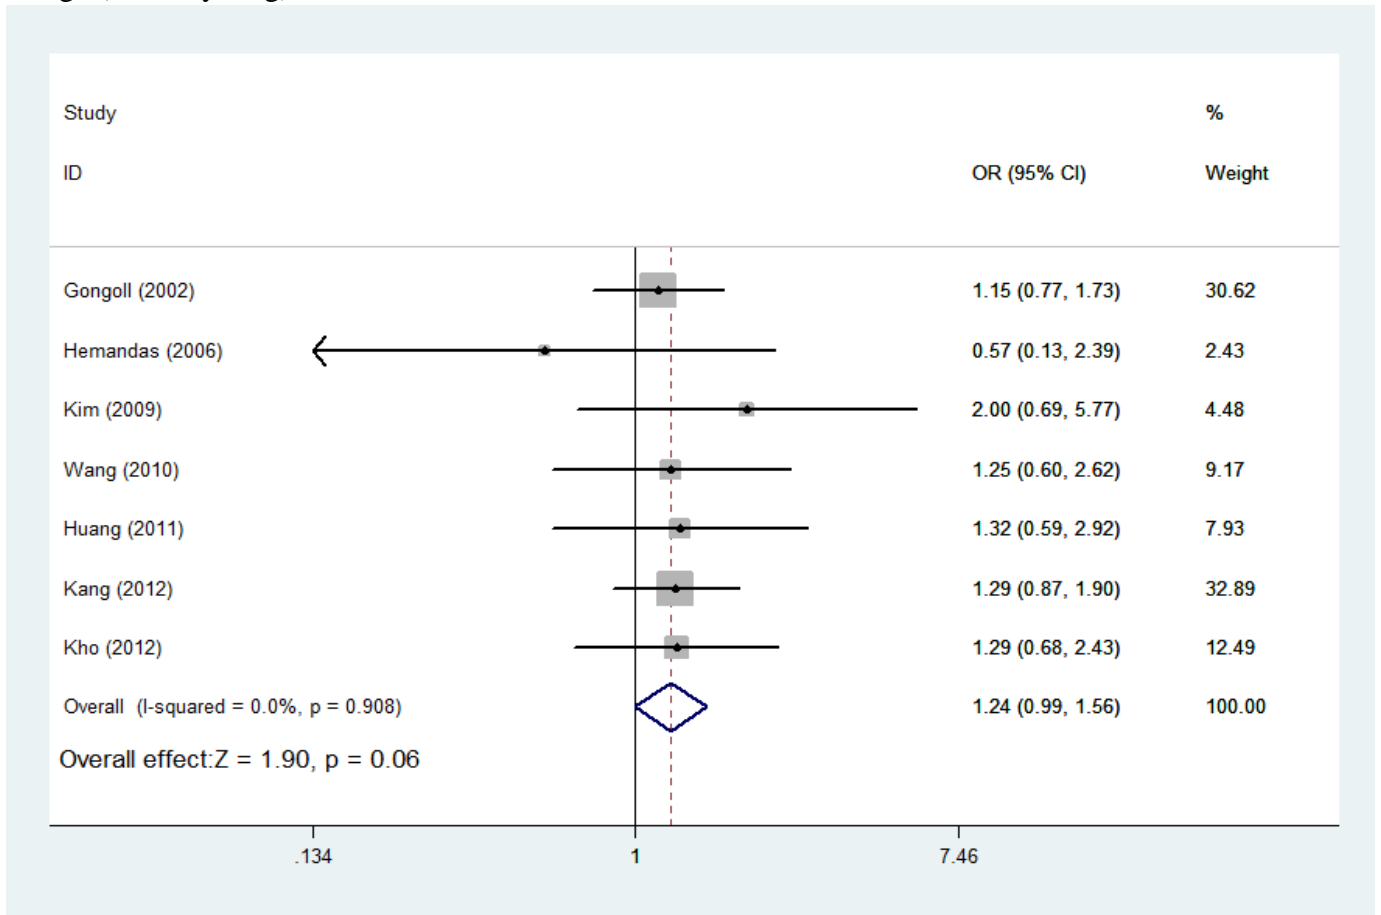

### 2. Gender (female vs. man):

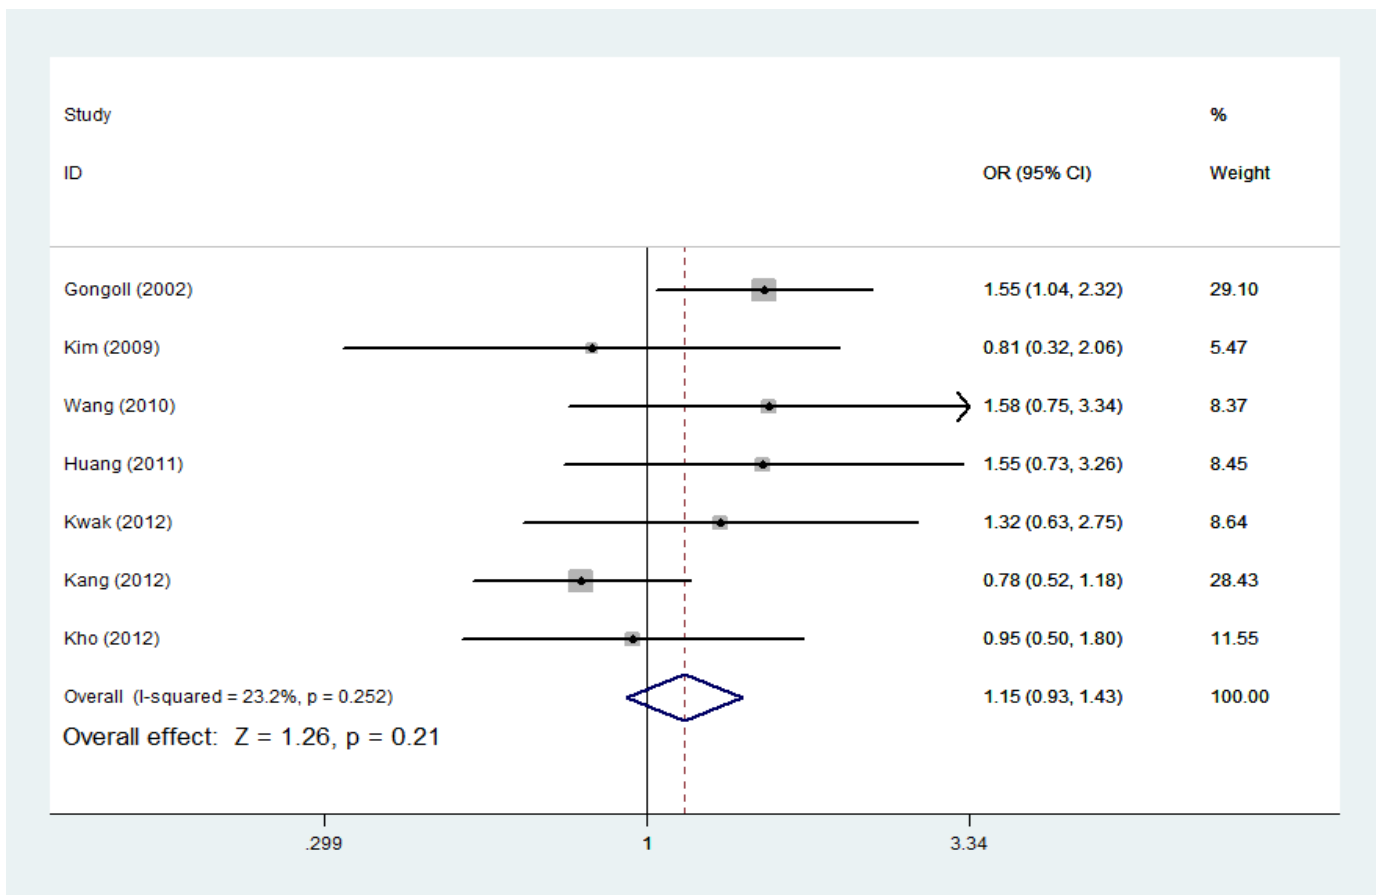

### 3. Tumor location (rectum vs. colon)

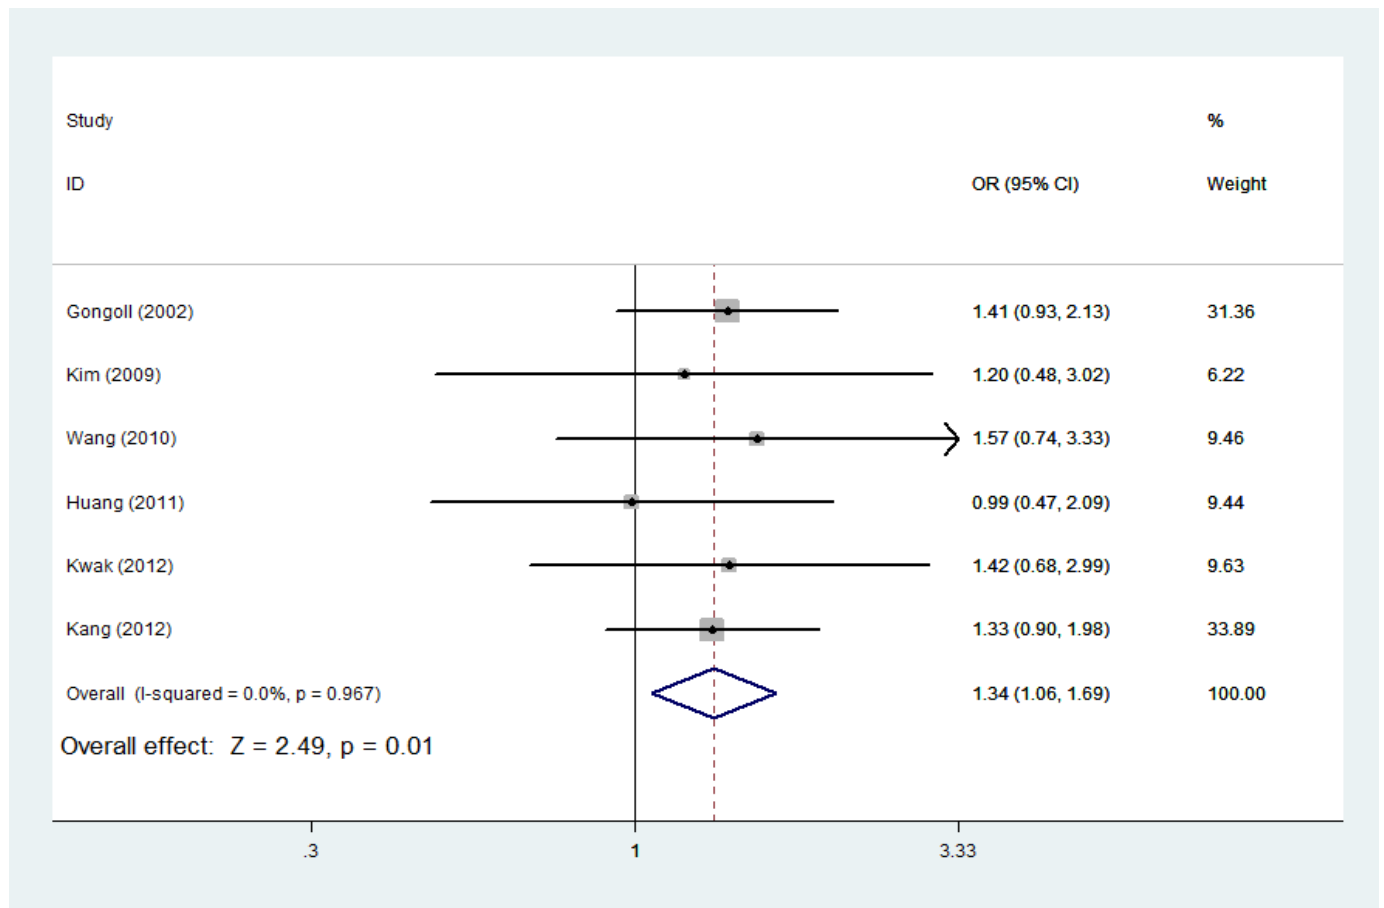

### 4. Differentiation (poorly vs. well and moderately)

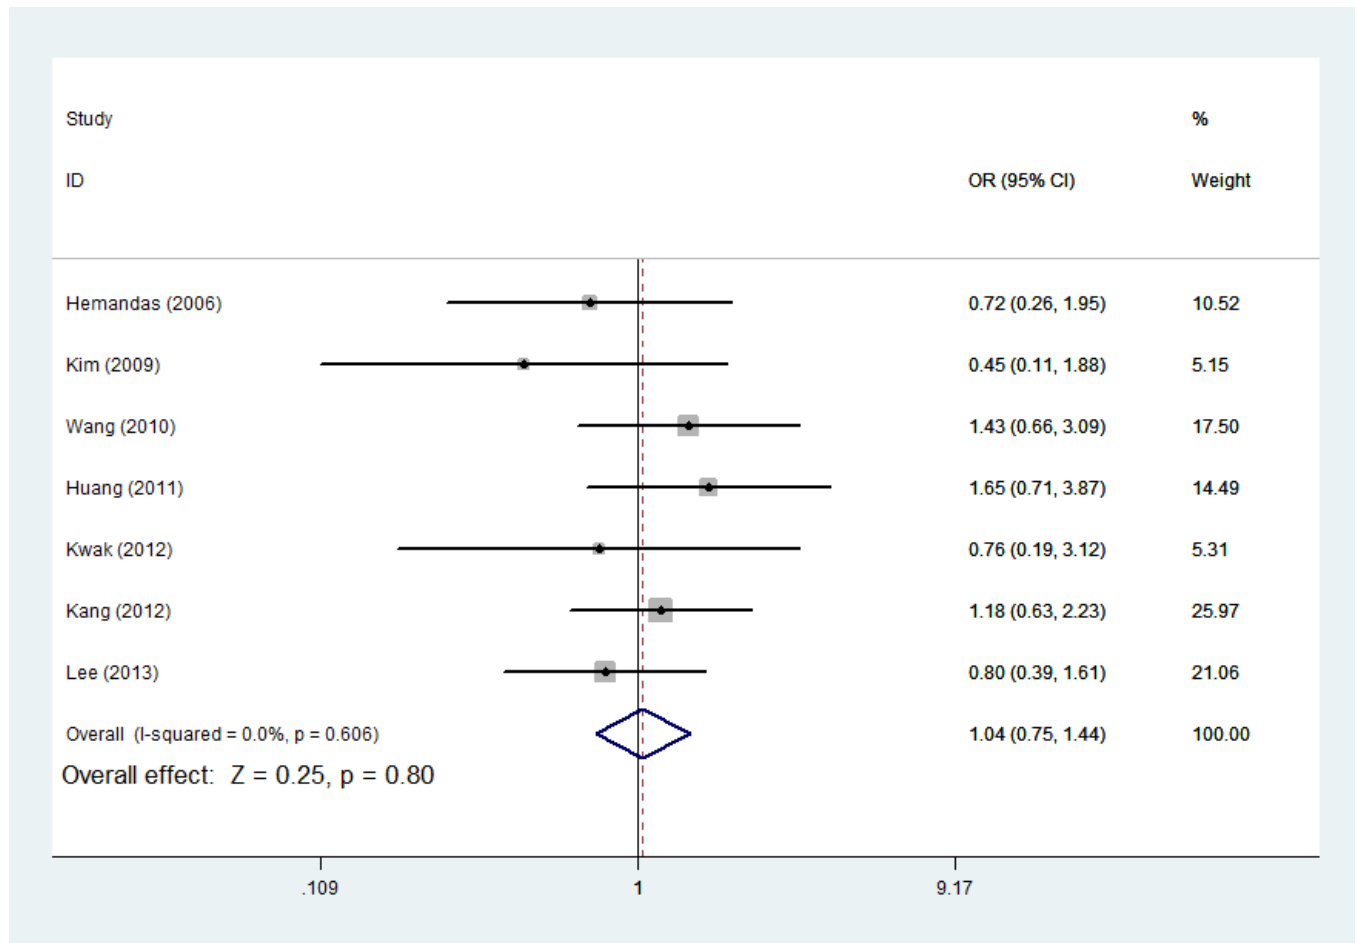

### 5. Lymph node metastasis (yes vs. no)

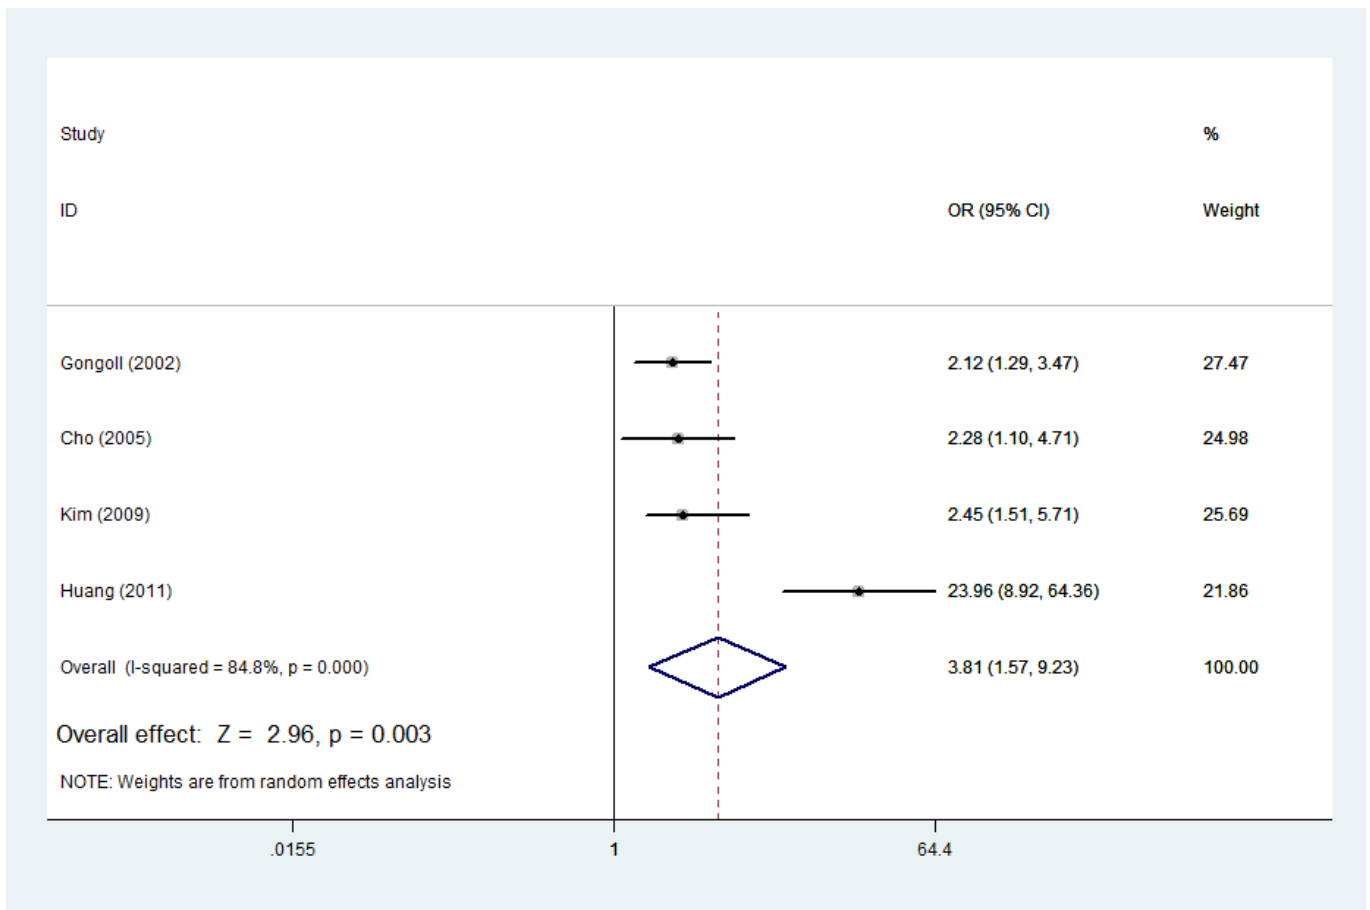

### 6. Nodal status(N1~2 vs N0)

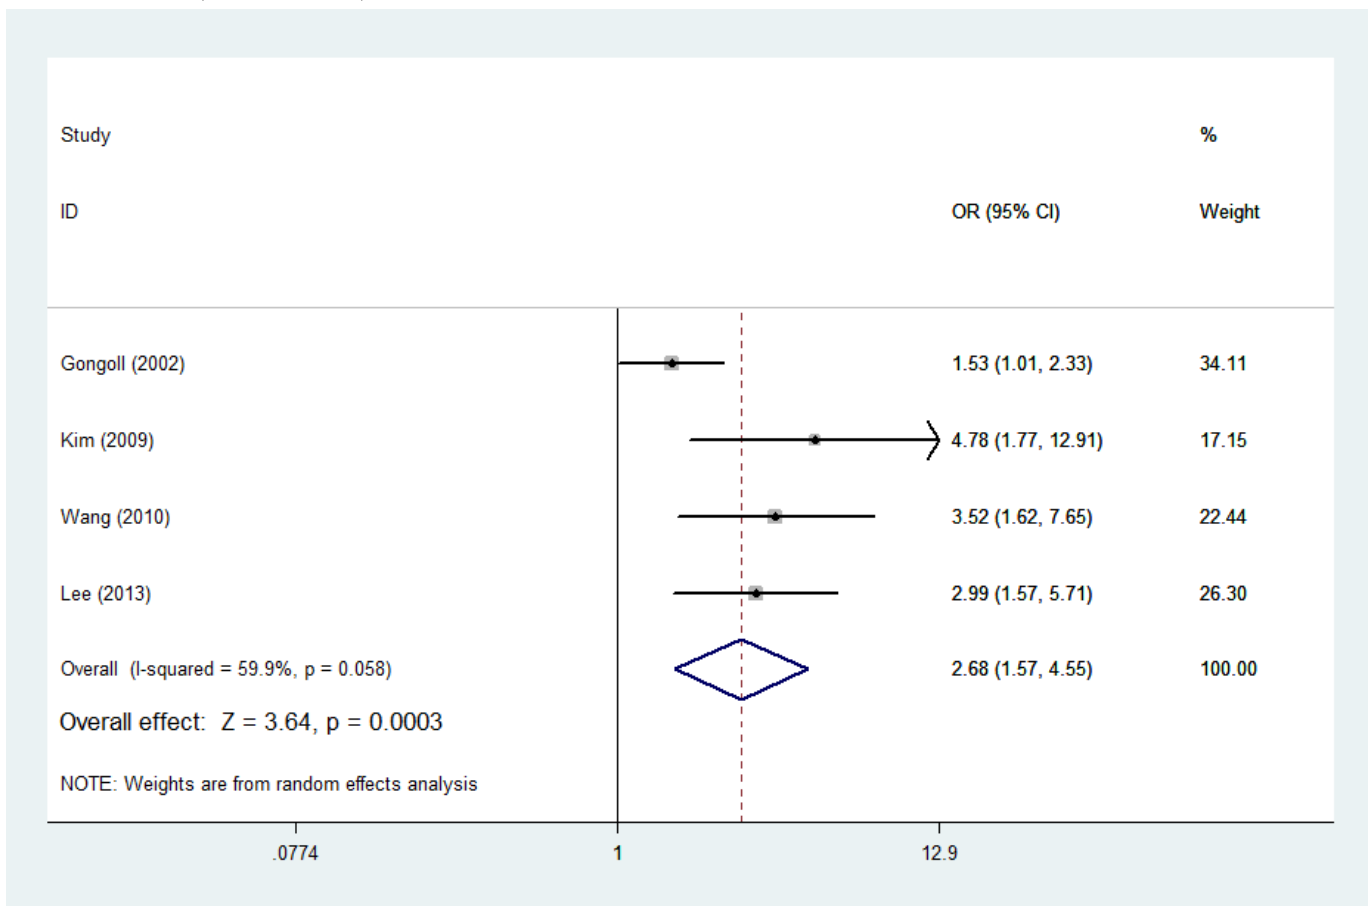

## 7. Distant metastasis (M1 vs. M0)

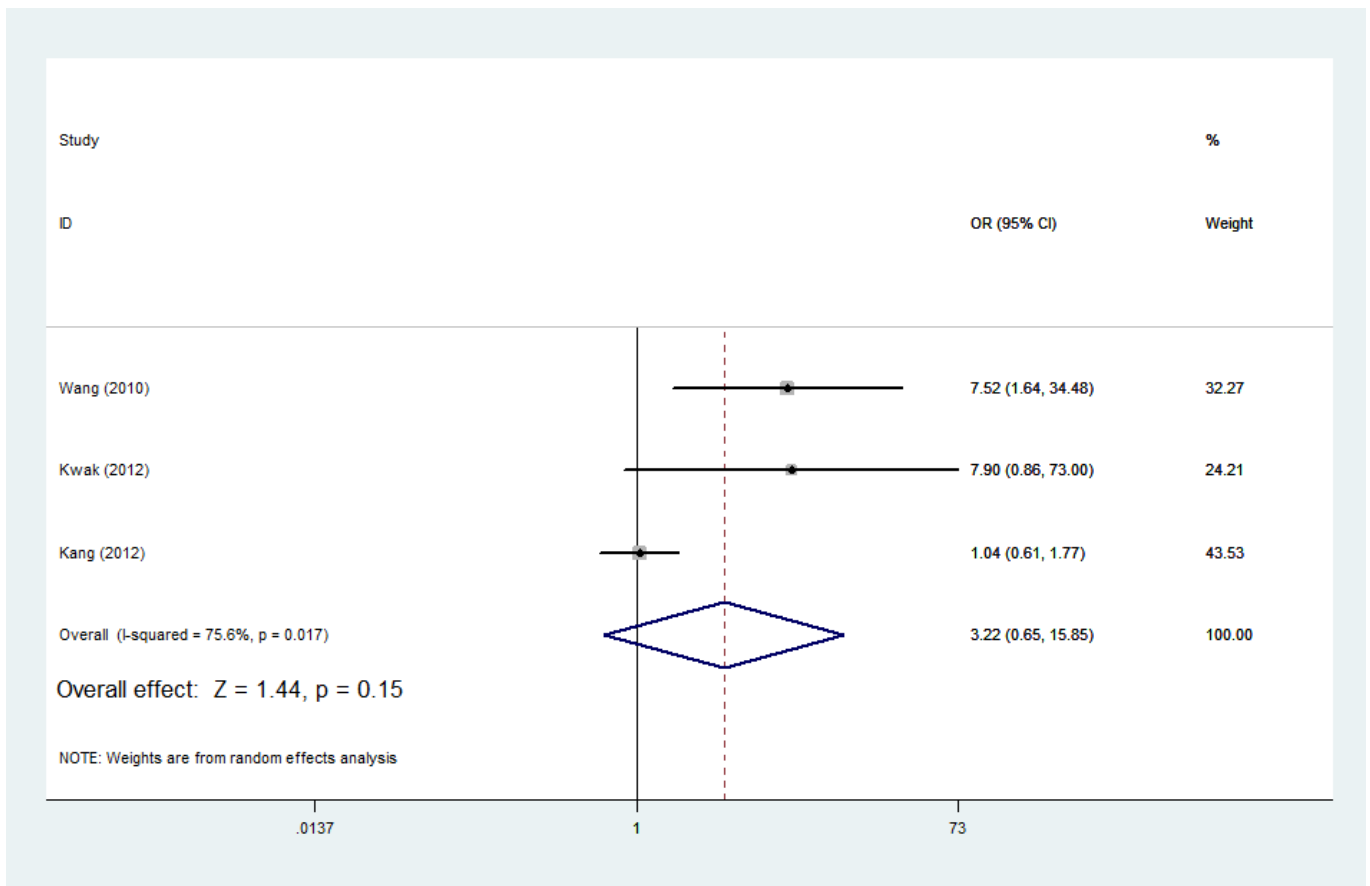

## 8. TNM stage ( III/IV vs. I/II)

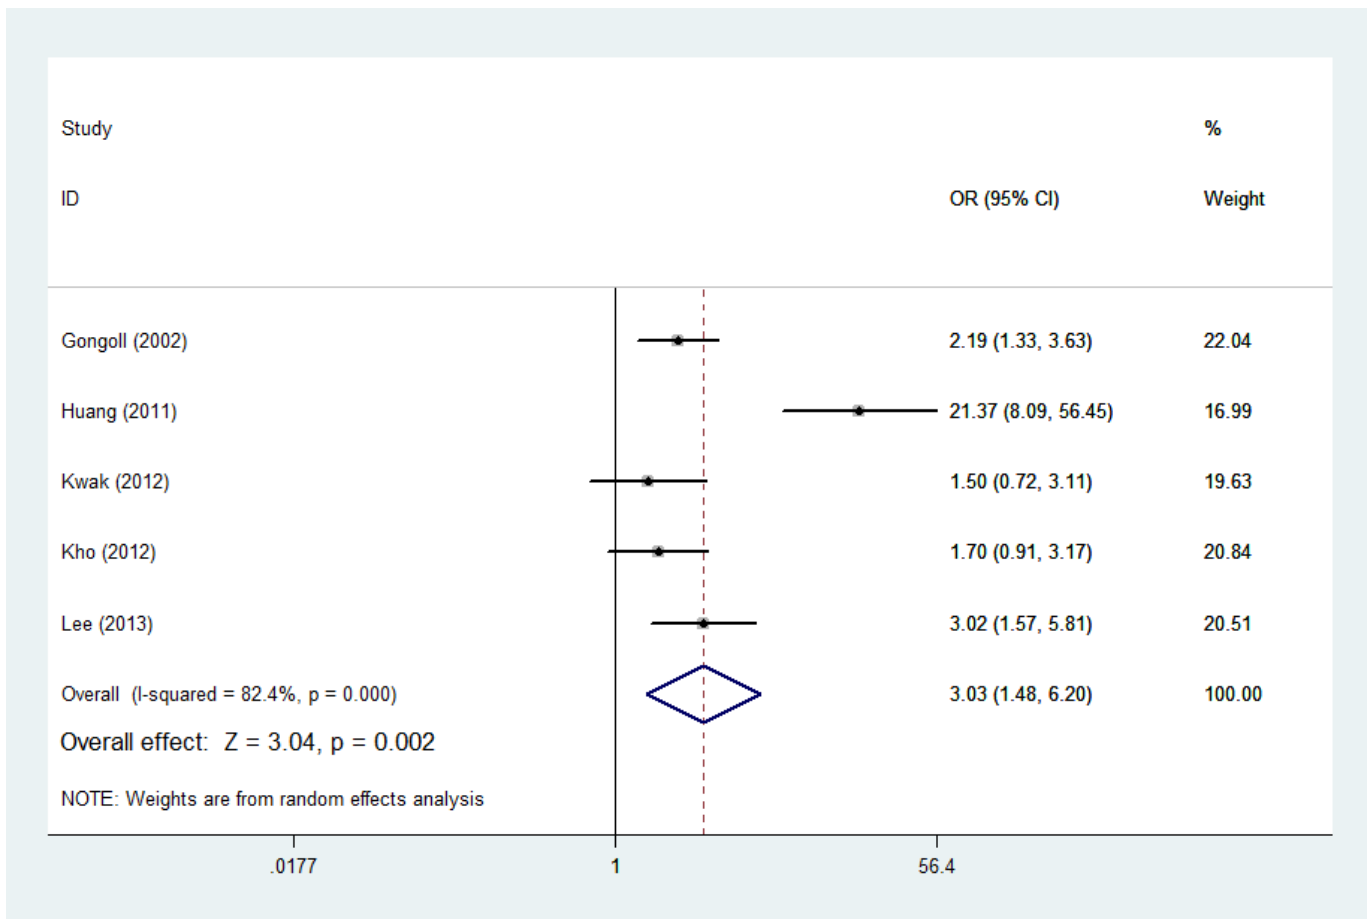

### 9. Tumor depth (T 3/4 vs. T 1/2)

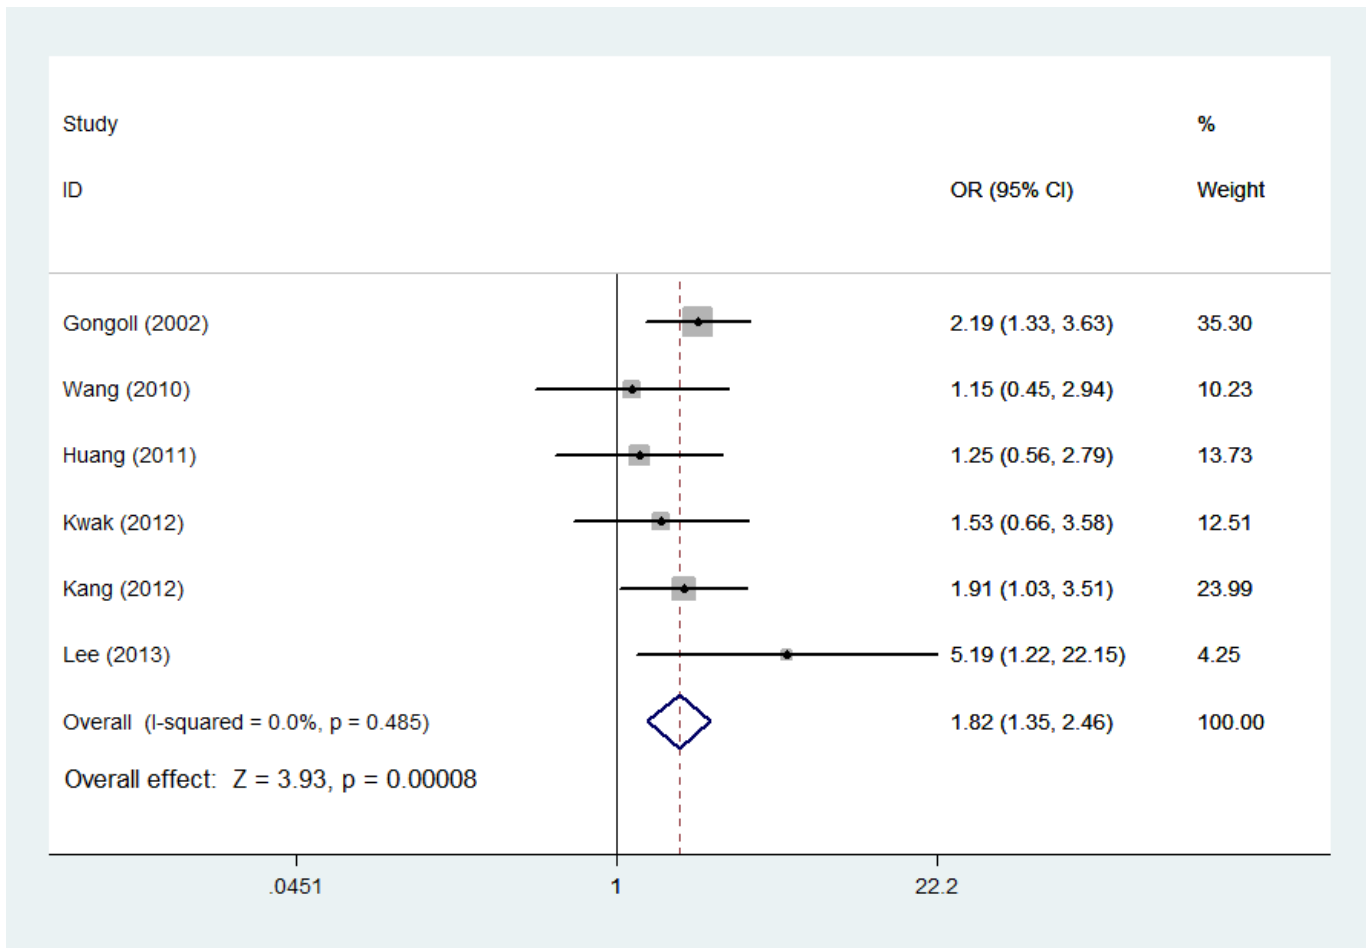

### 10. Tumor size (size $\geq 5$ cm vs. $< 5$ cm)

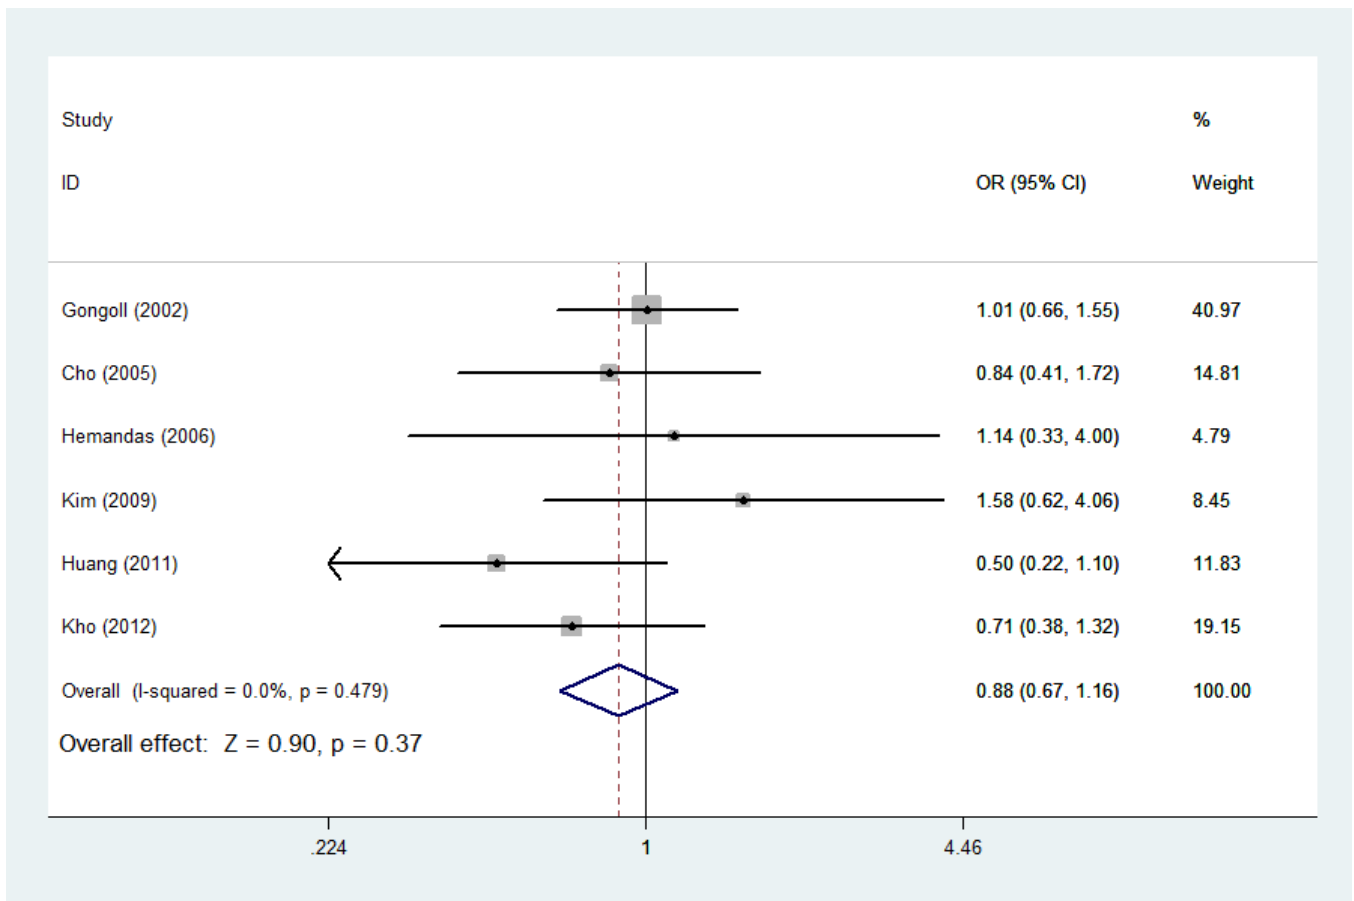

### 11. Vascular invasion (yes vs. no)

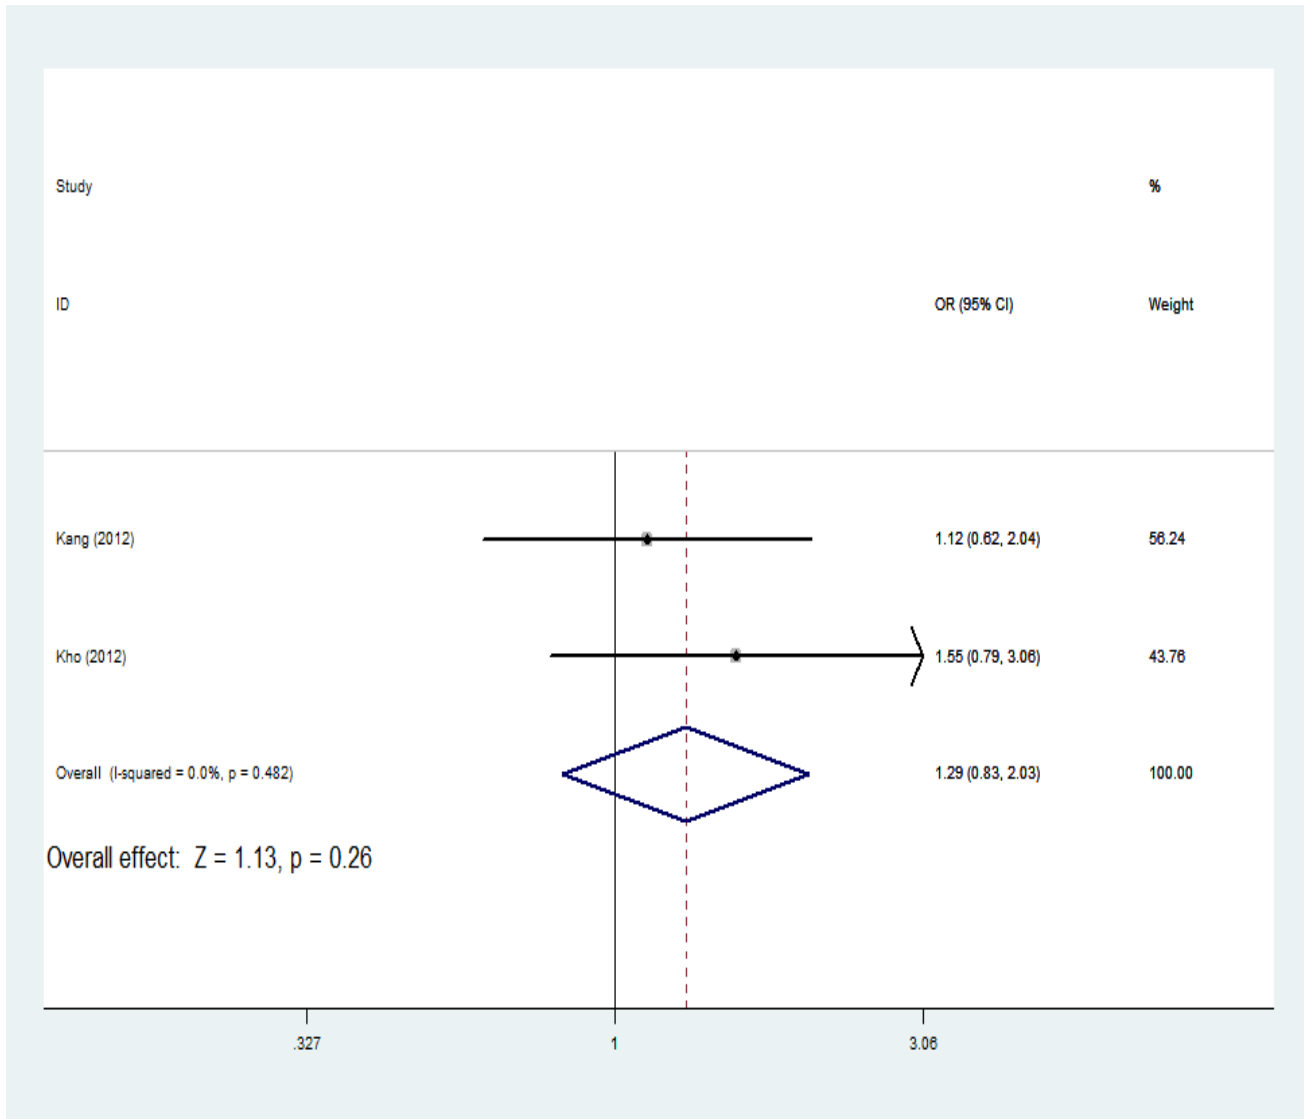

### 12. Recurrence (yes vs. no)

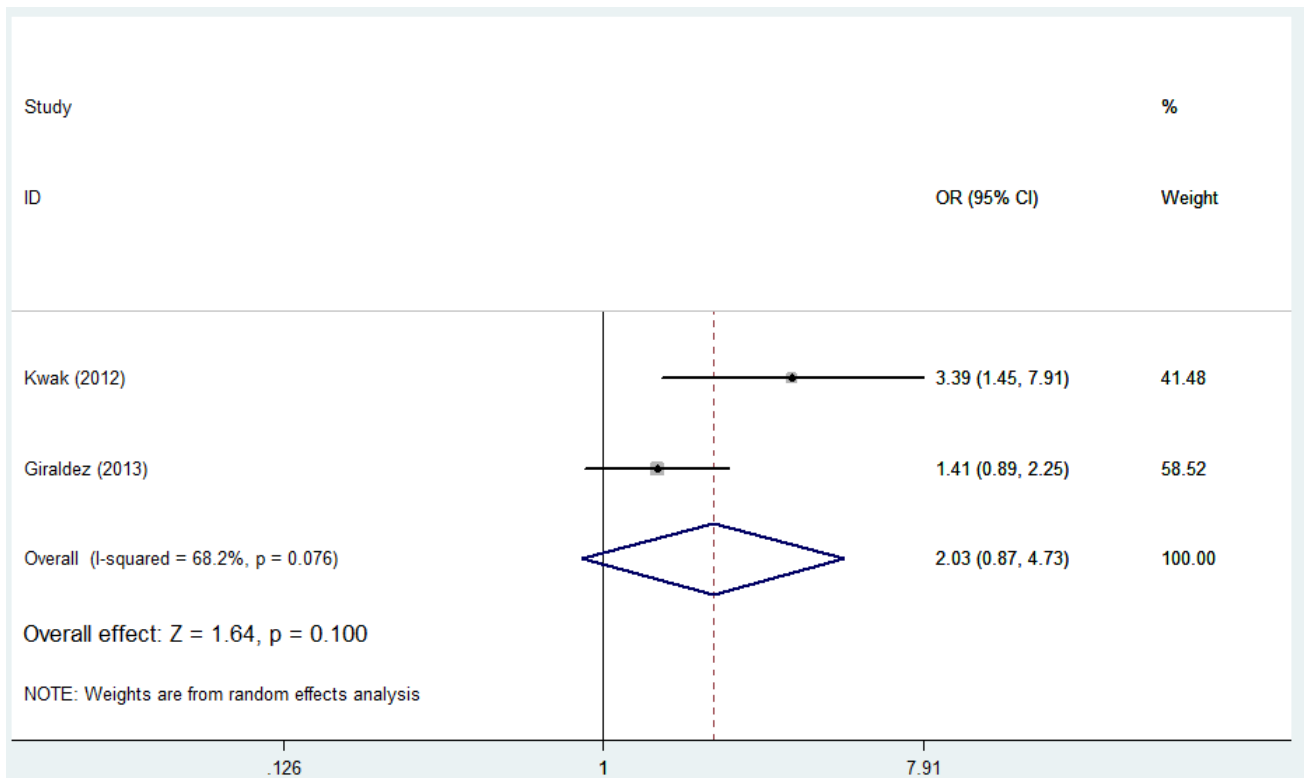

**Supplementary Figure S1 Legend:** Forest plot showing results of studies on the associations between S100A4 expression and clinicopathological parameters (age, gender, lymph node metastasis, tumor-node-metastasis (TNM) stage, differentiation, tumor depth, tumor size, tumor location, vascular invasion and recurrence).
